# Supplementary material for: EULAR recommendations for the reporting of ultrasound studies in rheumatic and musculoskeletal diseases (RMDs)
Source: HighWire-hosted journal article supplement (doi:10.1136/annrheumdis-2020-219816), 2021-01-22
Supplement: annrheumdis-2020-219816supp003_data_supplement.pdf [file annrheumdis-2020-219816supp003_data_supplement.pdf]

**Acknowledgments**

The authors want to thank all contributing experts who participated in the online survey: Servet Akar, Marta Aliste, Figen Ayhan, Xenofon Baraliakos, Dorcas Beaton, Stefano Bombardieri, Patrick Bossuyt, Julia Pui-Shan Chan, Isabelle Chary-Valckenaere, Mario Chavez, Paz Collado, Bernard Combe, Nemanja Damjanov, Juan Jose De Agustin de Oro, Paola de Pablo, Christian Dejaco, Mario Díaz, Banu Dilek, Tuncay Duruöz, Cristina Estracht, Bruno Fautrel, Georgios Filippou, Emilio Filippucci, Stephanie Finzel, Daniela Fodor, Marwin Gutierrez, Petra Hanova, Cristina Hernandez Diaz, Merete Hetland, Alojzija Hocevar, Sandrine Jousse-Joulin, David Kane, Ali Karahan, Dimitrios Karokis, Margreet Kloppenburg, Juhani Koski, Benoît Le Goff, Estibaliz Loza, Pierluigi Macchioni, Arthur Mandelin, Bernhard Manger, Carlo Martinoli, Ana Marusic, Lara Maxwell, Ingrid Möller, Bozena Moskalewicz, Gael Mouterde, Rodina Nestorova, Michihiro Ogasawara, Shigeru Ohno, Sarah Ohrndorf, Predrag Ostojic, Philippe Peetrons, Carlos Pineda, Goran Radunovic, John Raftakis, Bethan Richards, Alena Rudenka, Fernando Saraiva, Carlo Alberto Scirè, Luca Sconfienza, Andrea Sedie, Lucia Silva-Fernández, Luis Ines Sousa, Johannes Strunk, Iwona Sudol-Szopinska, Takeshi Suzuki, Marcin Szkudlarek, Alister Taggart, Alberto Tagliafico, Giorgio Tamborrini, Tiraje Tuncer, Astrid van Tubergen, Lucio Ventura, Patrick Verschueren, Suzanne Verstappen, Alexandr Volkov, Florentin Vreju, Ruth Wittoek, Zilfigar Yusifov, Jakub Zavada, Mirjana Zlatkovic-Svenda, Pascal Zufferey.
